# Supplementary material for: Decoding the Substrate Supply to Human Neuronal Nitric Oxide Synthase
Source: PubMed Central journal article supplement (PMC3706577; doi:10.1371/journal.pone.0067707), 2013-07-09

Figure S2:

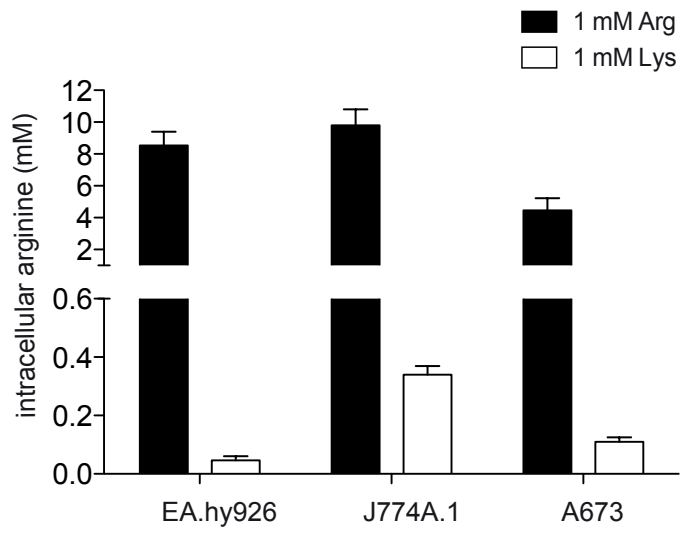

Supplement: pone.0067707.s002.pdf [file pone.0067707.s002.pdf]
